# Supplementary material for: Microwave assisted one-pot synthetic route to imidazo[1,2-a]pyrimidine derivatives of imidazo/triazole clubbed pyrazole and their pharmacological screening
Source: Royal Society of Chemistry journal article supplement (doi:10.1039/c8nj00670a), 2018-01-01

**Supplementary Information**

**Microwave assisted one-pot synthetic route to imidazo[1,2-a]pyrimidine derivatives of imidazo/triazole clubbed pyrazole and their pharmacological screening**

Pratibha Prasad, Anirudhdha G. Kalola, and Manish P. Patel\*

Department of Chemistry, Sardar Patel University, Vallabh Vidyanagar-388120,  
Gujarat, India

| <b>S. No.</b> | <b>Table of Contents</b>                                     | <b>Page</b> |
|---------------|--------------------------------------------------------------|-------------|
| 1.            | The <sup>1</sup> H NMR spectrum of compound <b>8,9(a-g)</b>  | 2-8         |
| 2.            | The <sup>13</sup> C NMR spectrum of compound <b>8,9(a-g)</b> | 9-13        |
| 3.            | The Mass spectrum of compound <b>8 a, d, g</b>               | 14-15       |
| 4.            | The Mass spectrum of compound <b>9 a, c, f</b>               | 15-16       |

# <sup>1</sup>H NMR spectra of compound **8a**

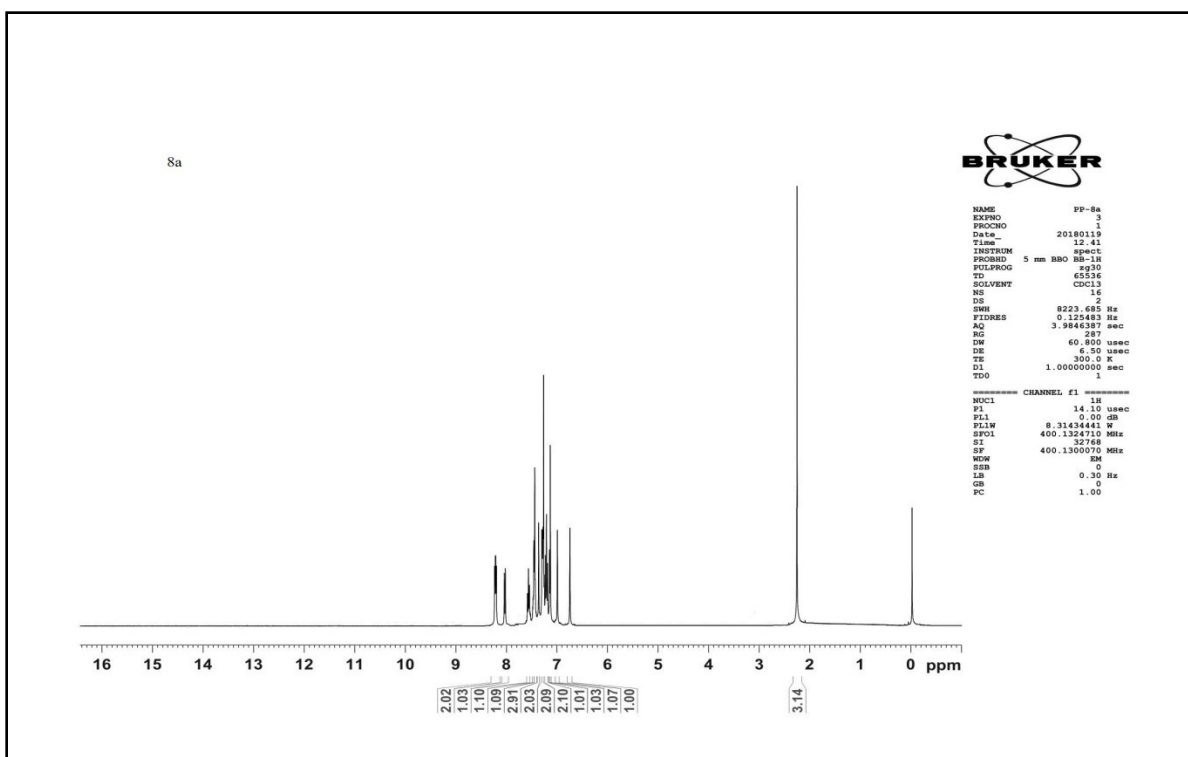

# <sup>1</sup>H NMR spectra of compound **8b**

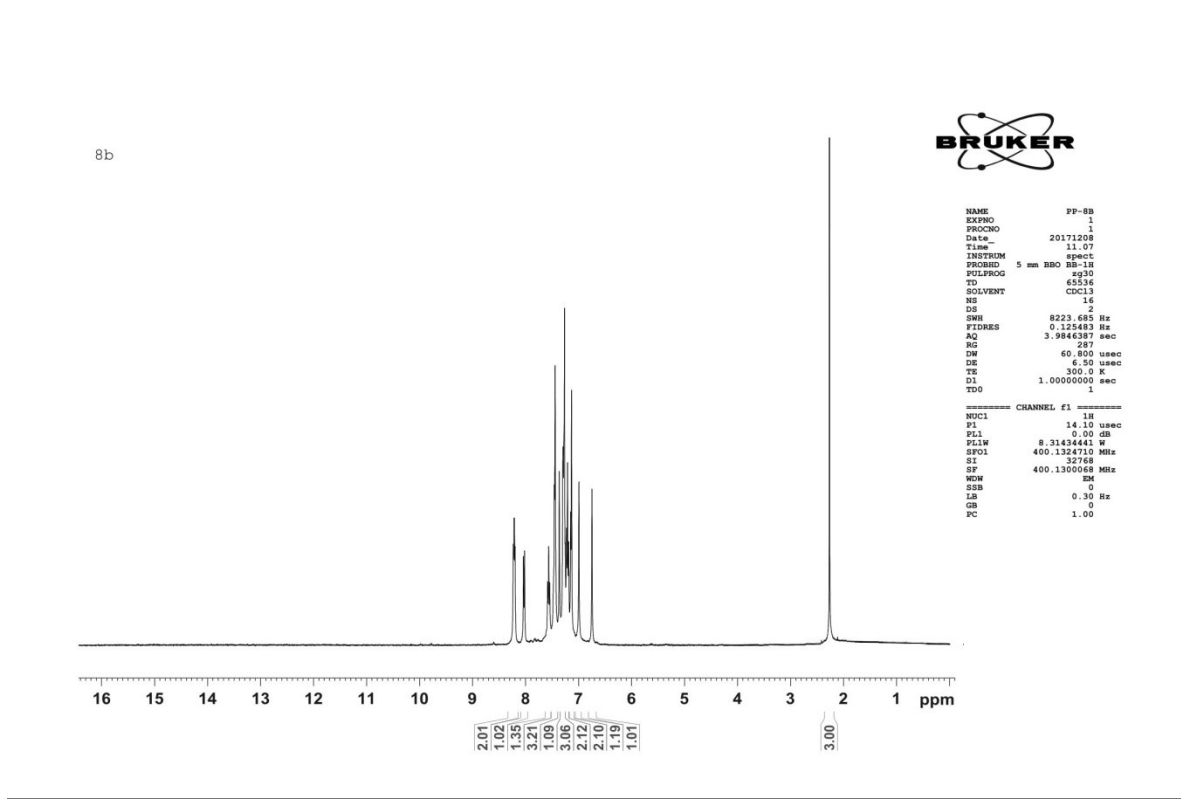

$^1\text{H}$  NMR spectra of compound **8c**

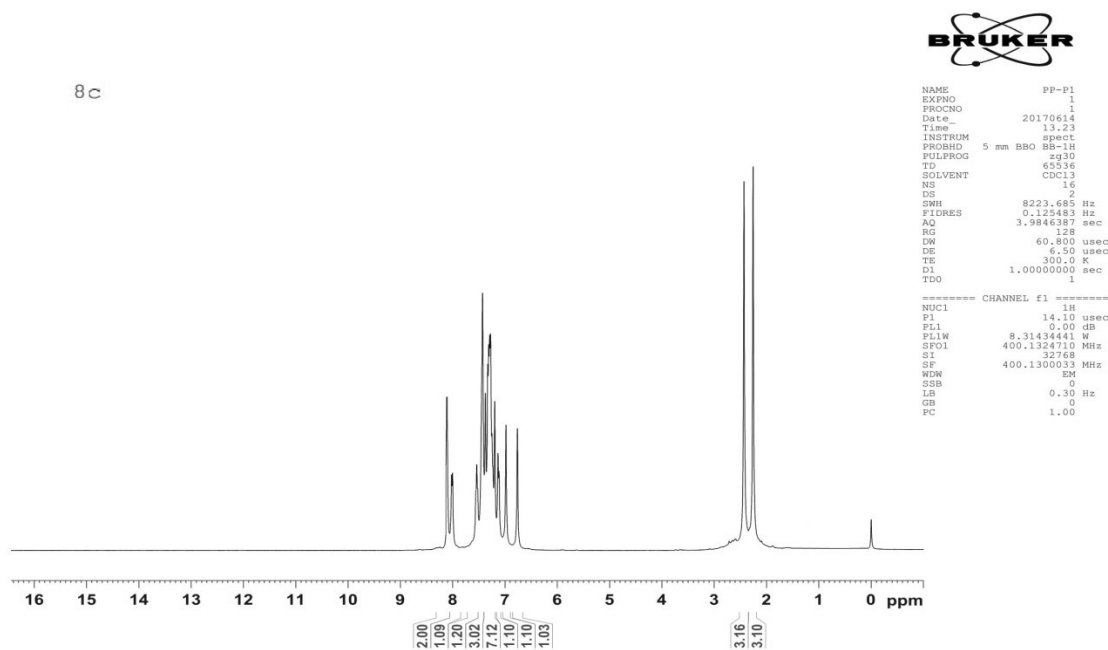

$^1\text{H}$  NMR spectra of compound **8d**

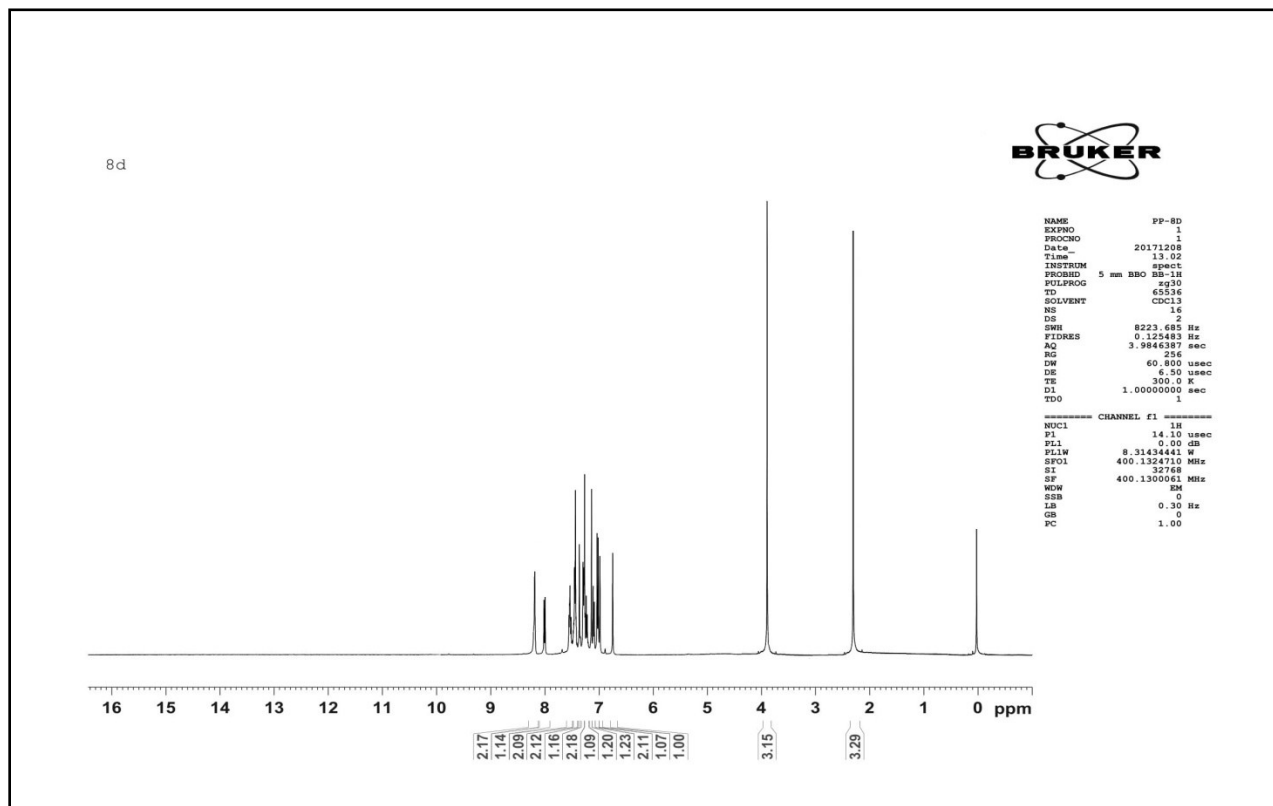

$^1\text{H}$  NMR spectra of compound **8e**

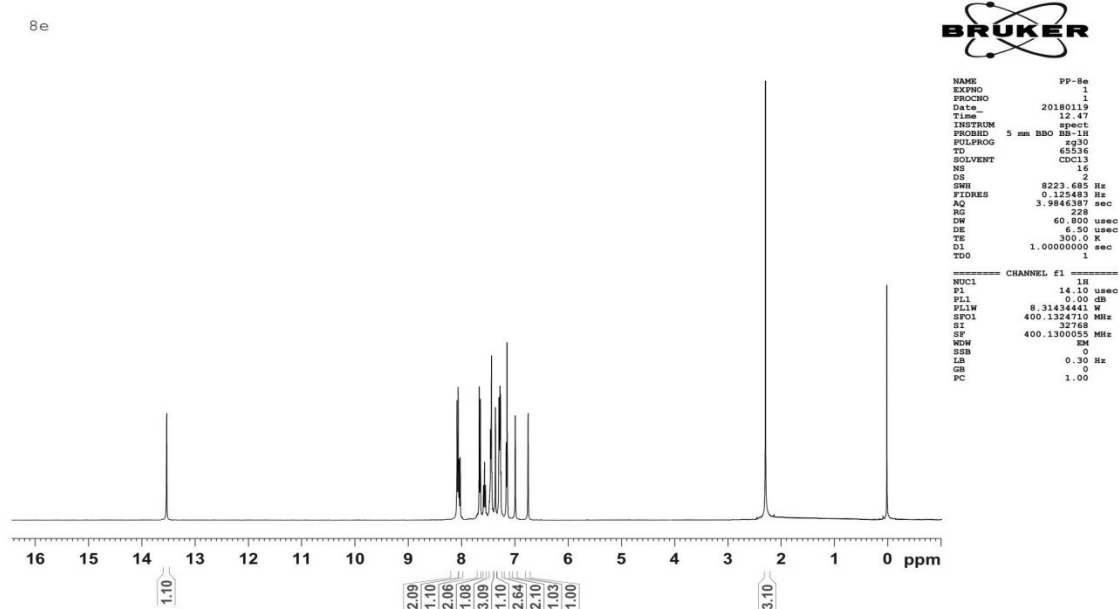

$^1\text{H}$  NMR spectra of compound **8f**

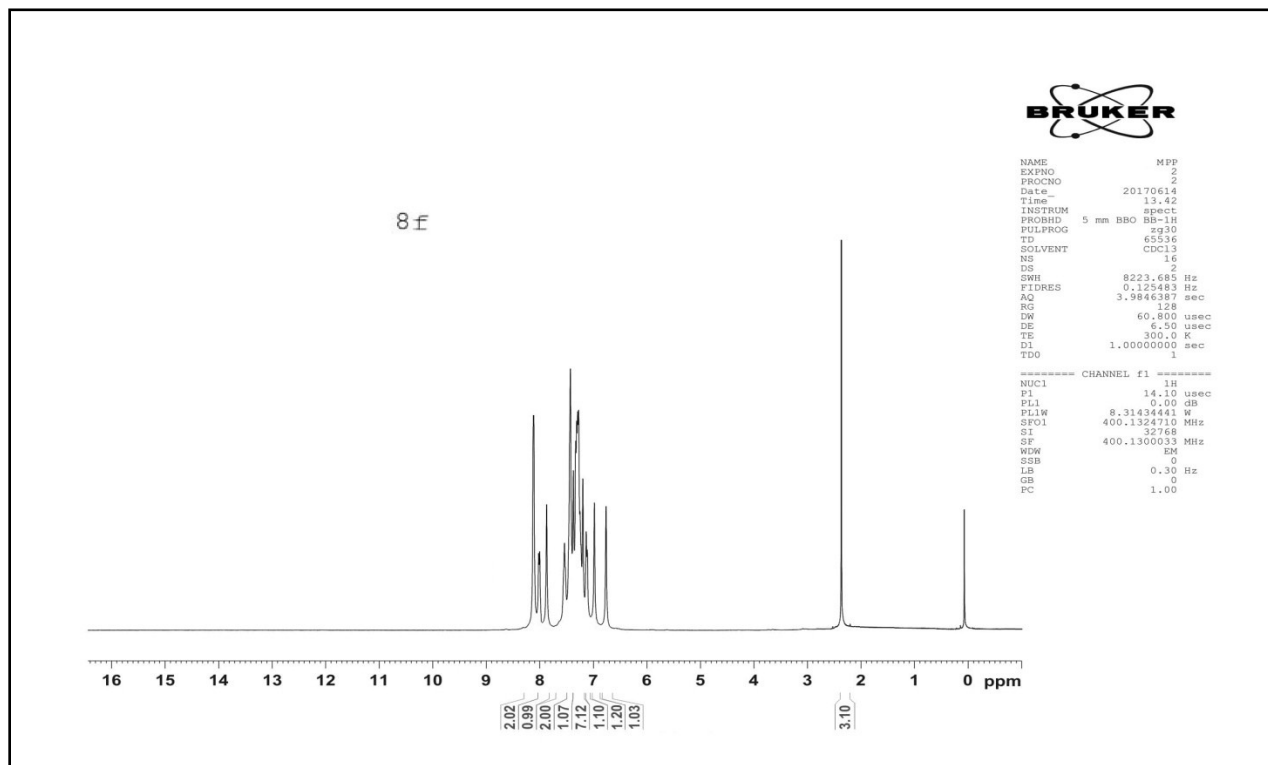

$^1\text{H}$  NMR spectra of compound **8g**

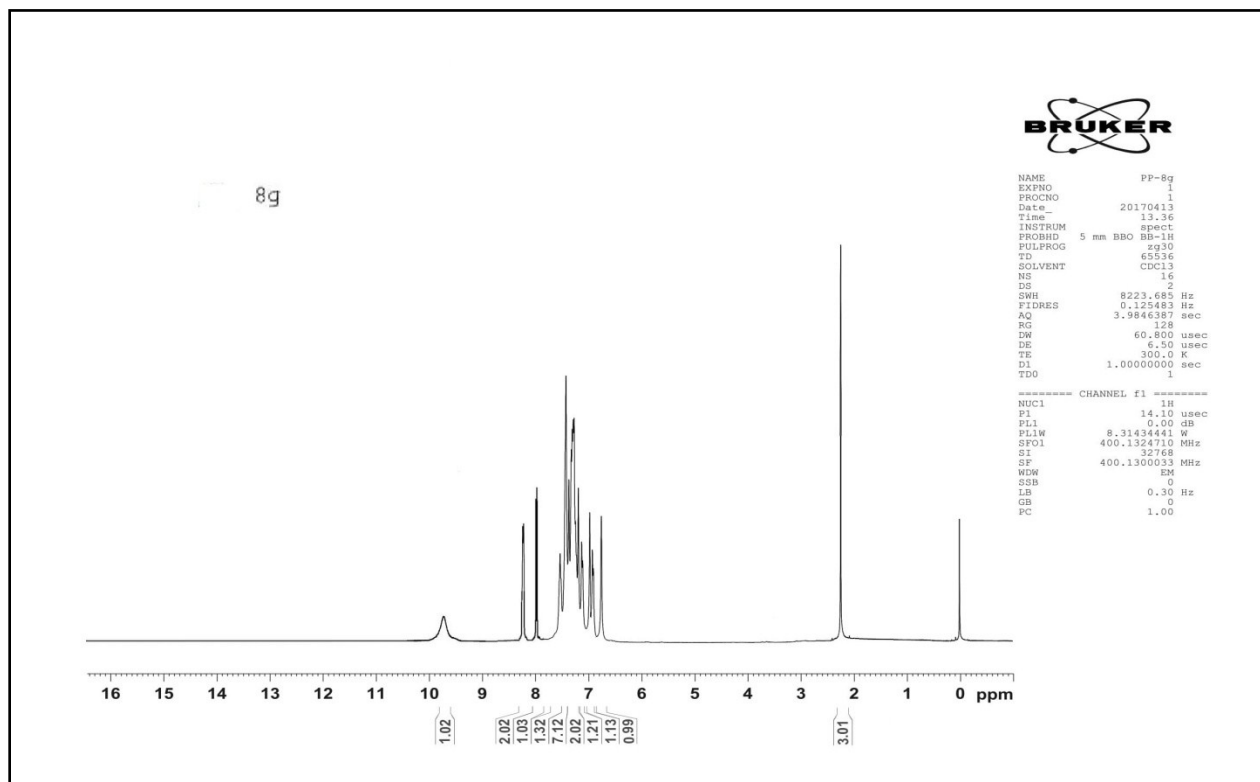

$^1\text{H}$  NMR spectra of compound **9a**

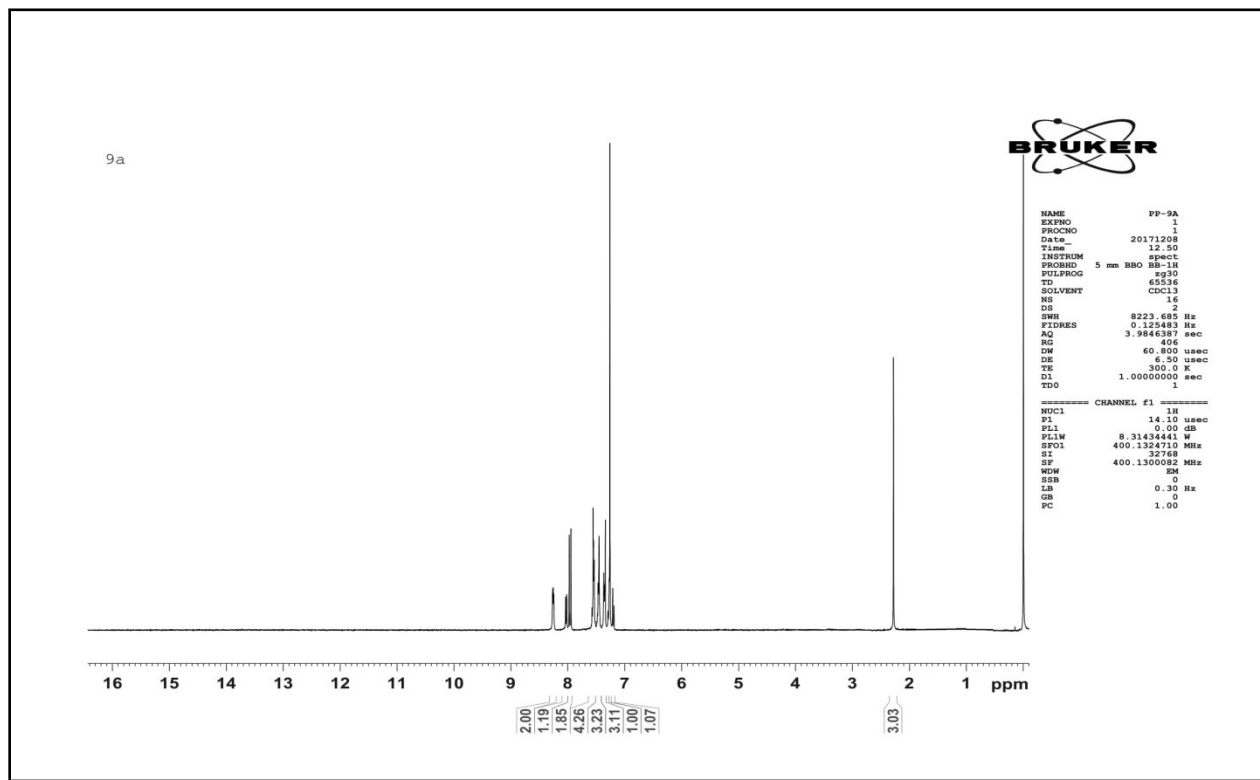

# <sup>1</sup>H NMR spectra of compound 9b

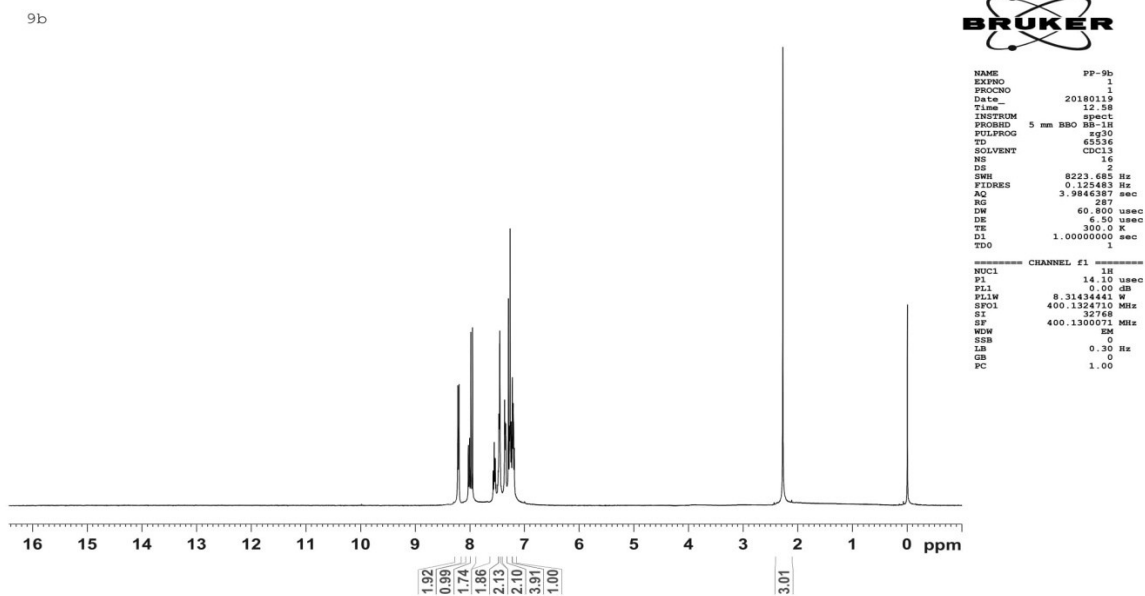

# <sup>1</sup>H NMR spectra of compound 9c

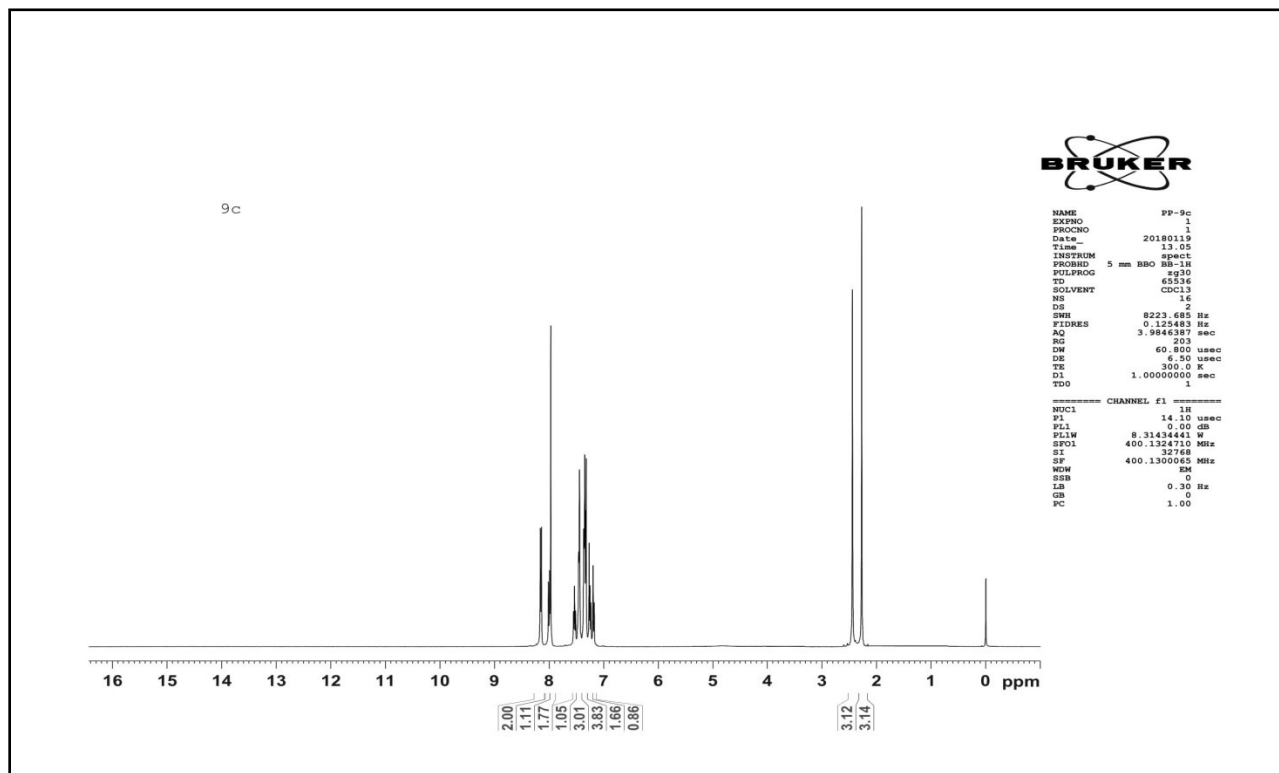

$^1\text{H}$  NMR spectra of compound **9d**

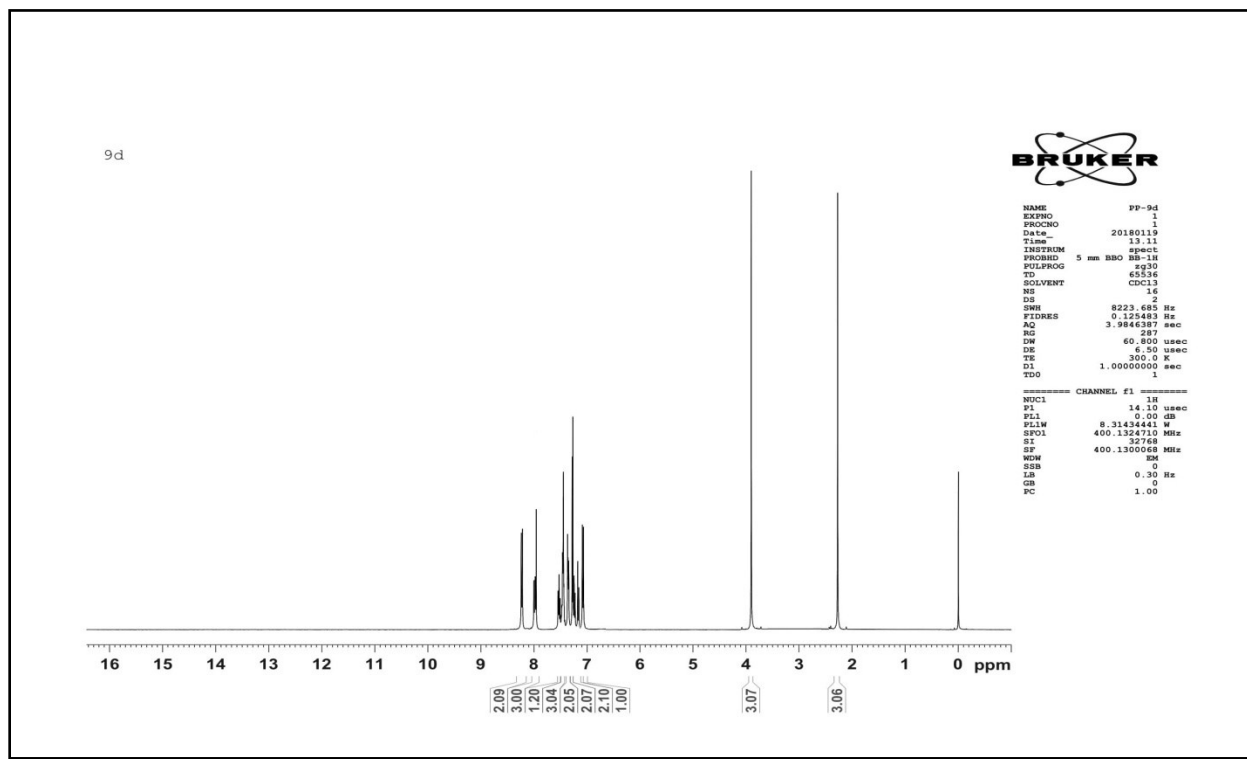

$^1\text{H}$  NMR spectra of compound **9e**

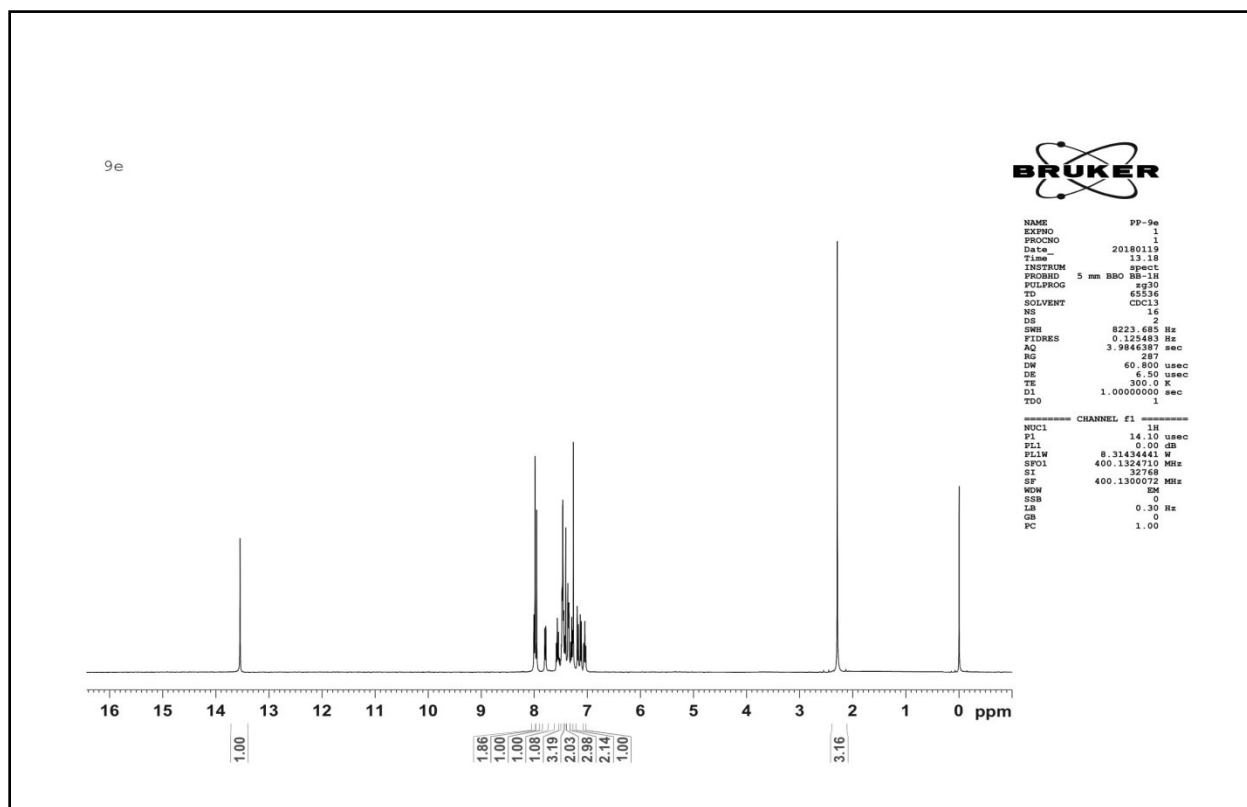

# <sup>1</sup>H NMR spectra of compound **9f**

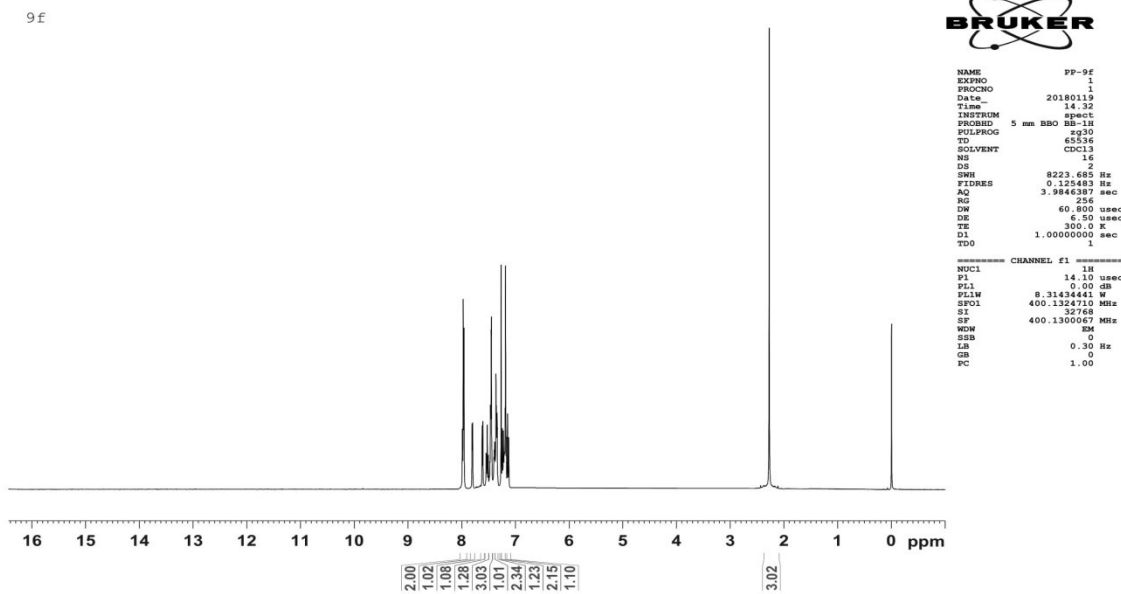

# <sup>1</sup>H NMR spectra of compound **9g**

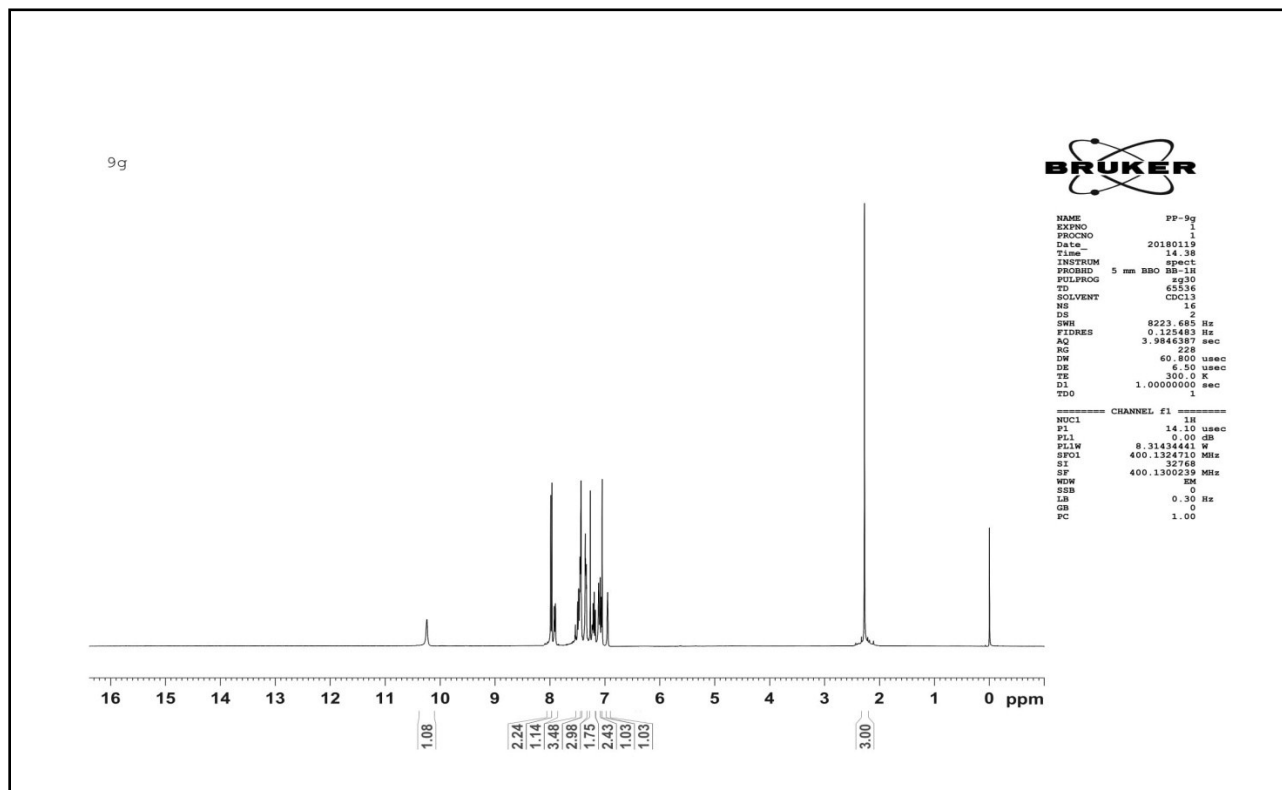



# <sup>13</sup>C NMR spectra of compound **8a**

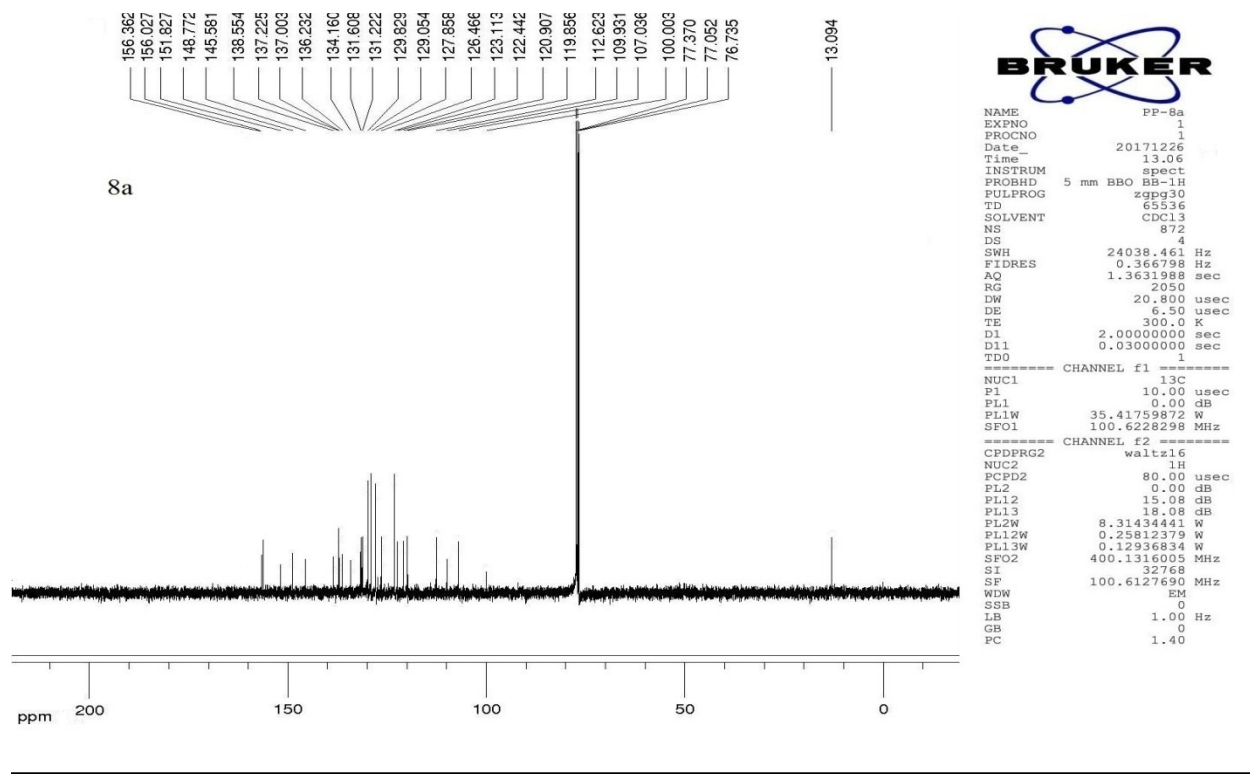

# <sup>13</sup>C NMR spectra of compound **8b**

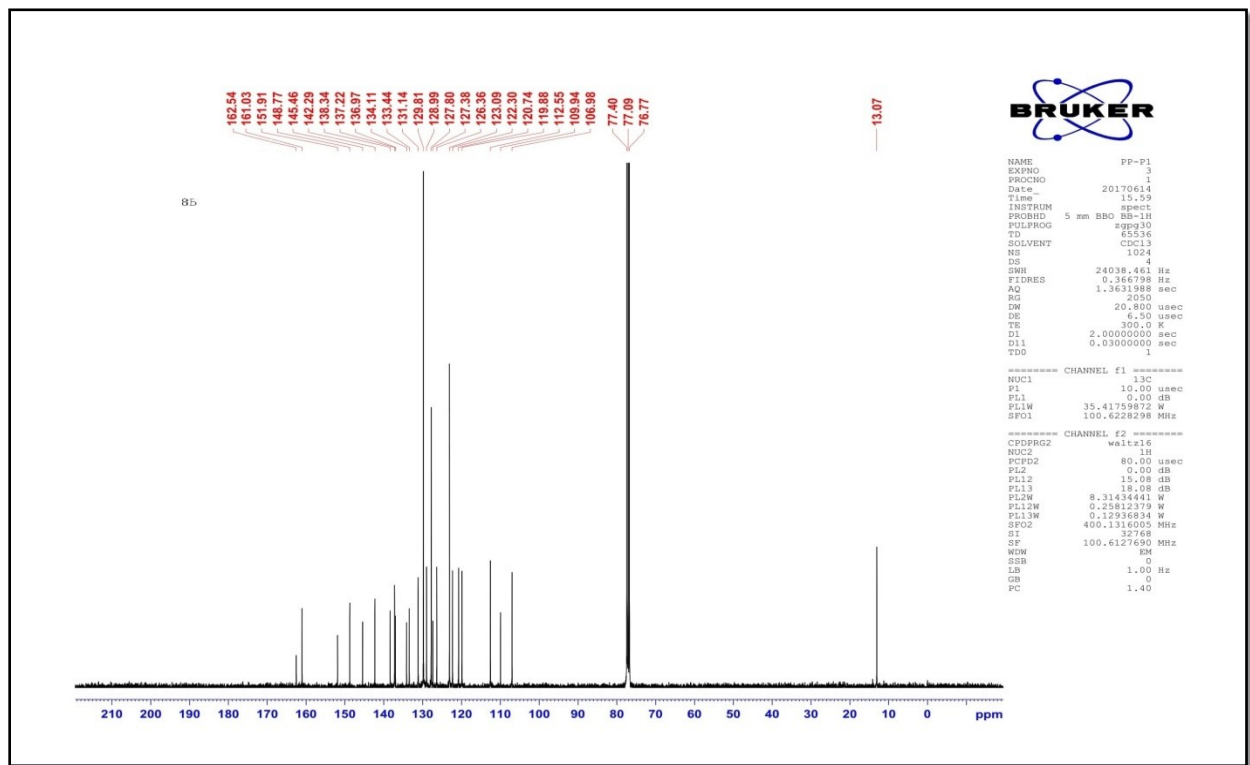

# <sup>13</sup>C NMR spectra of compound 8c

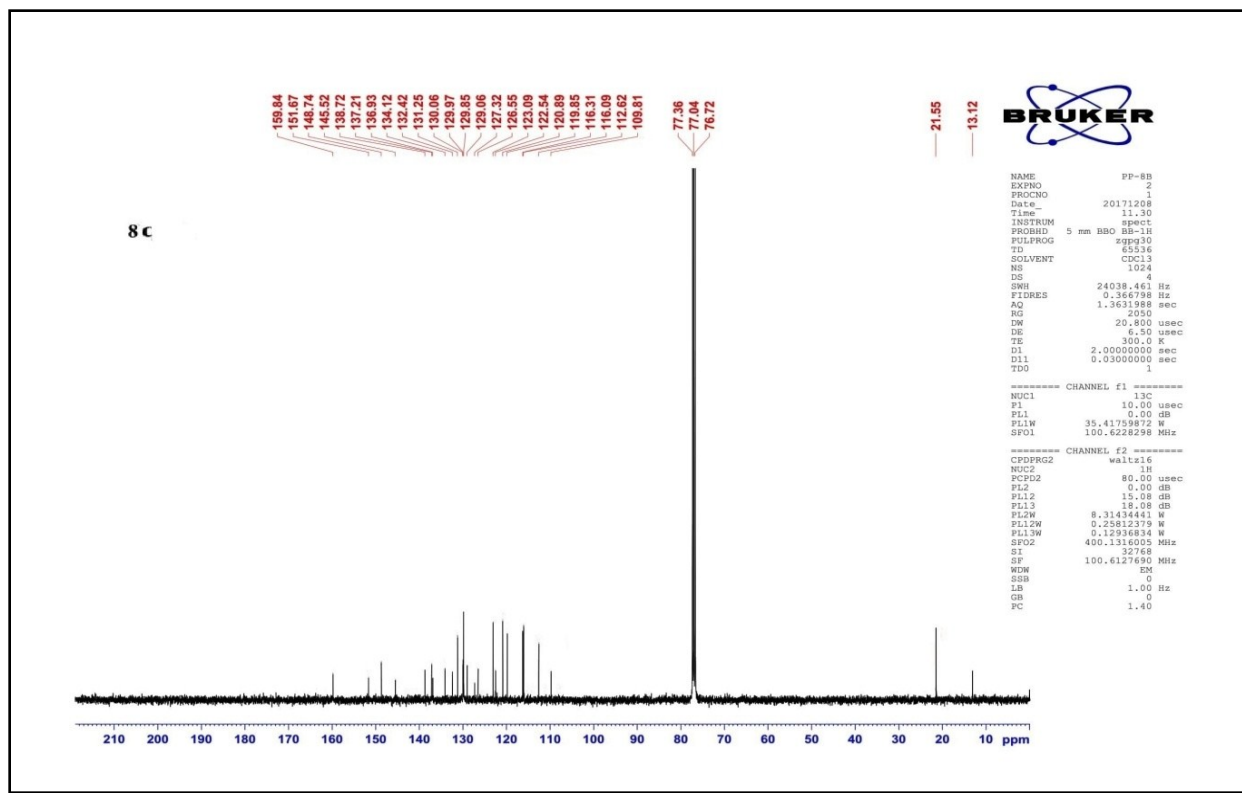

# <sup>13</sup>C NMR spectra of compound 8d

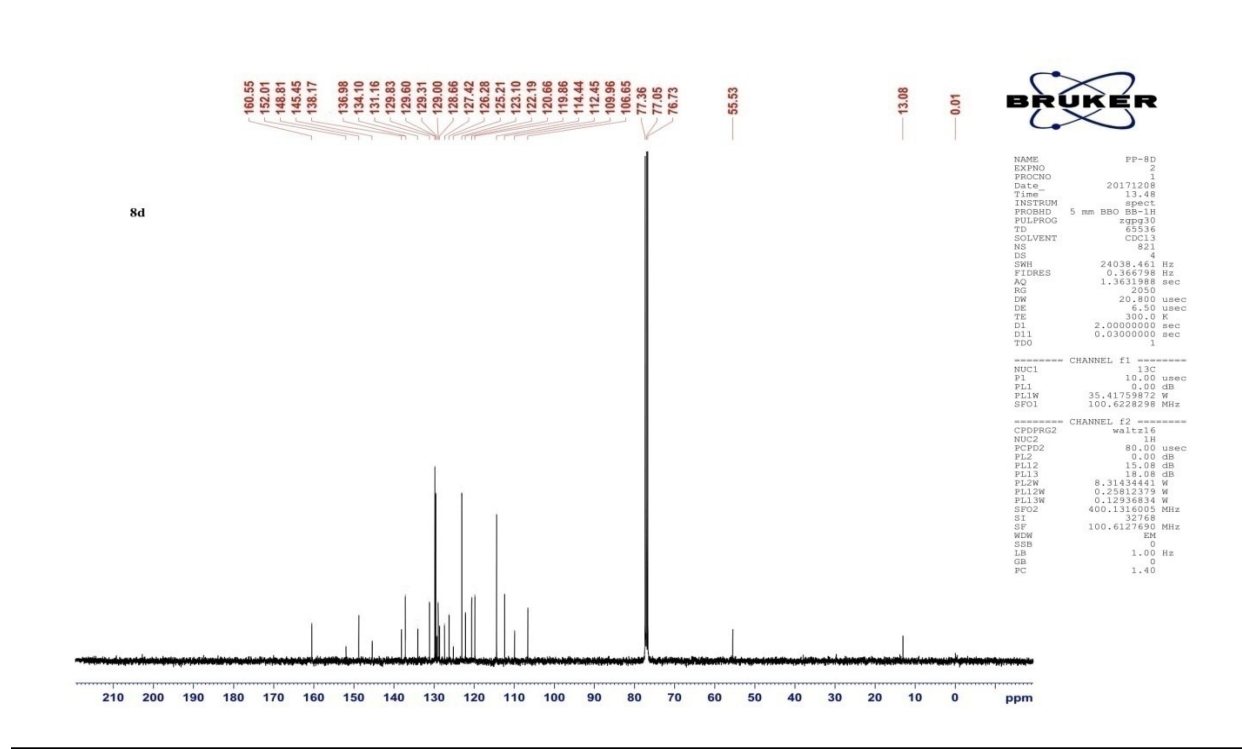

$^{13}\text{C}$  NMR spectra of compound **8g**

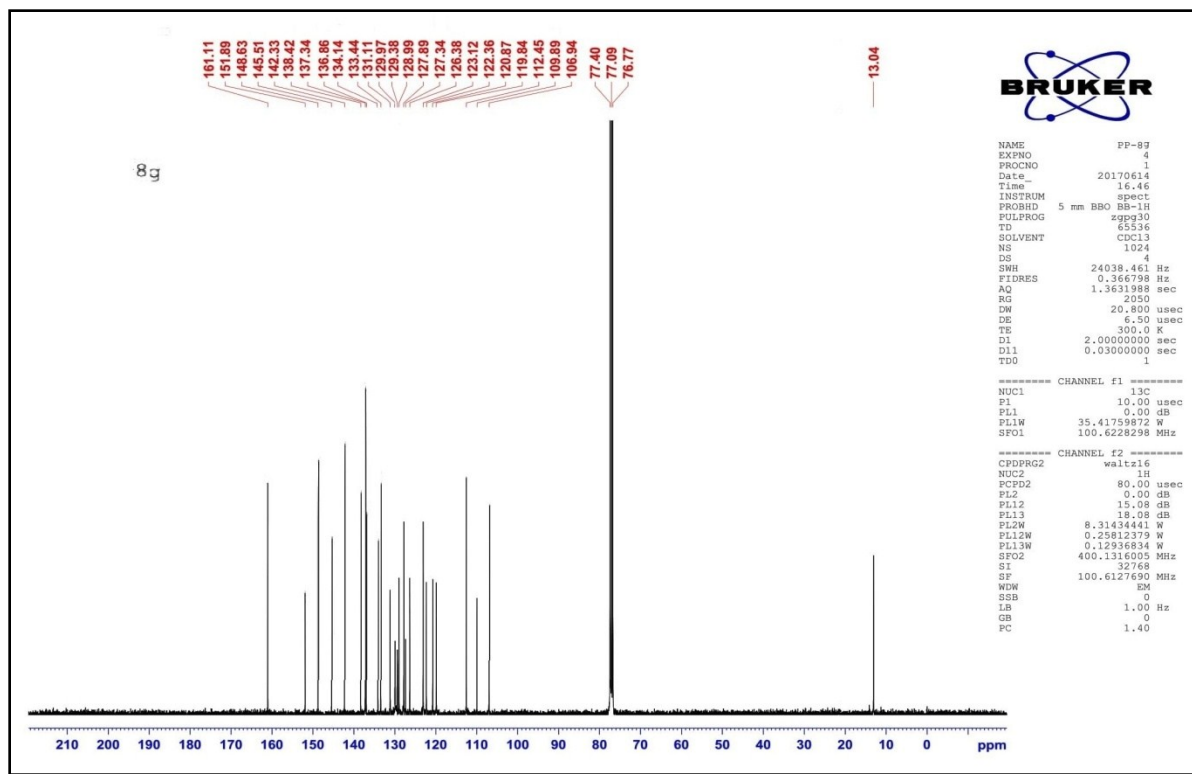

$^{13}\text{C}$  NMR spectra of compound **9b**

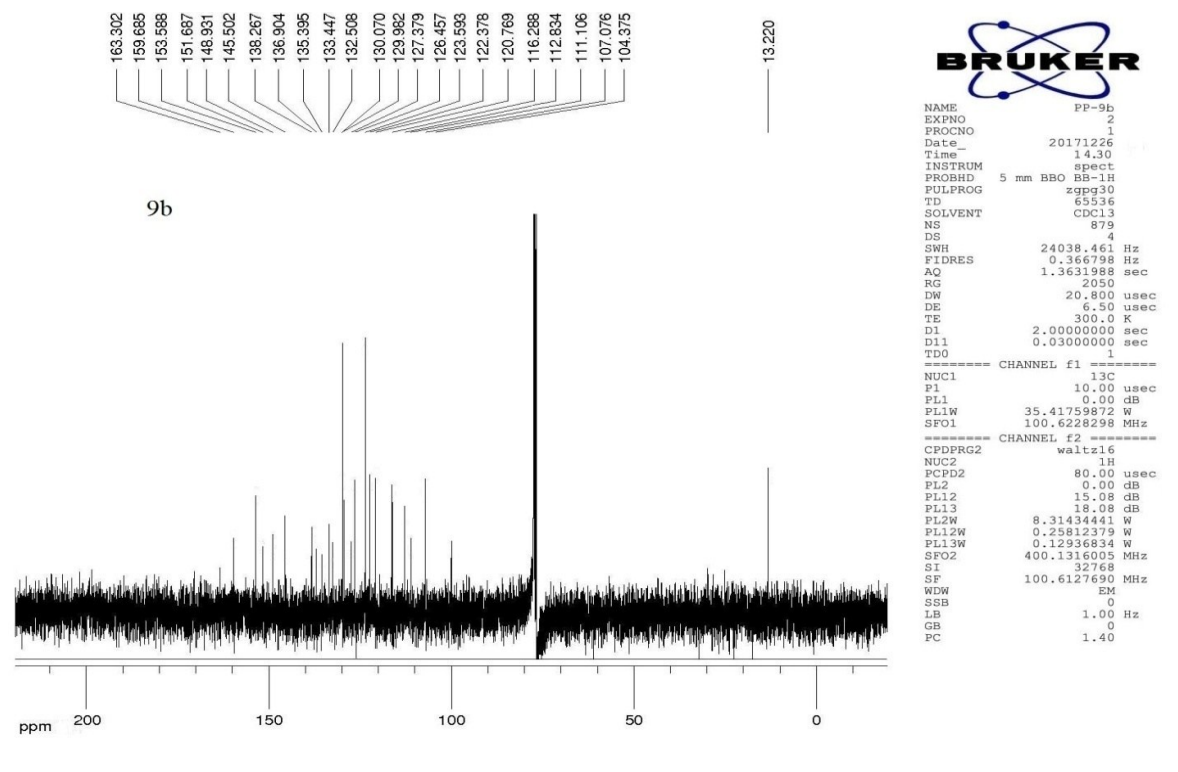

# <sup>13</sup>C NMR spectra of compound 9c

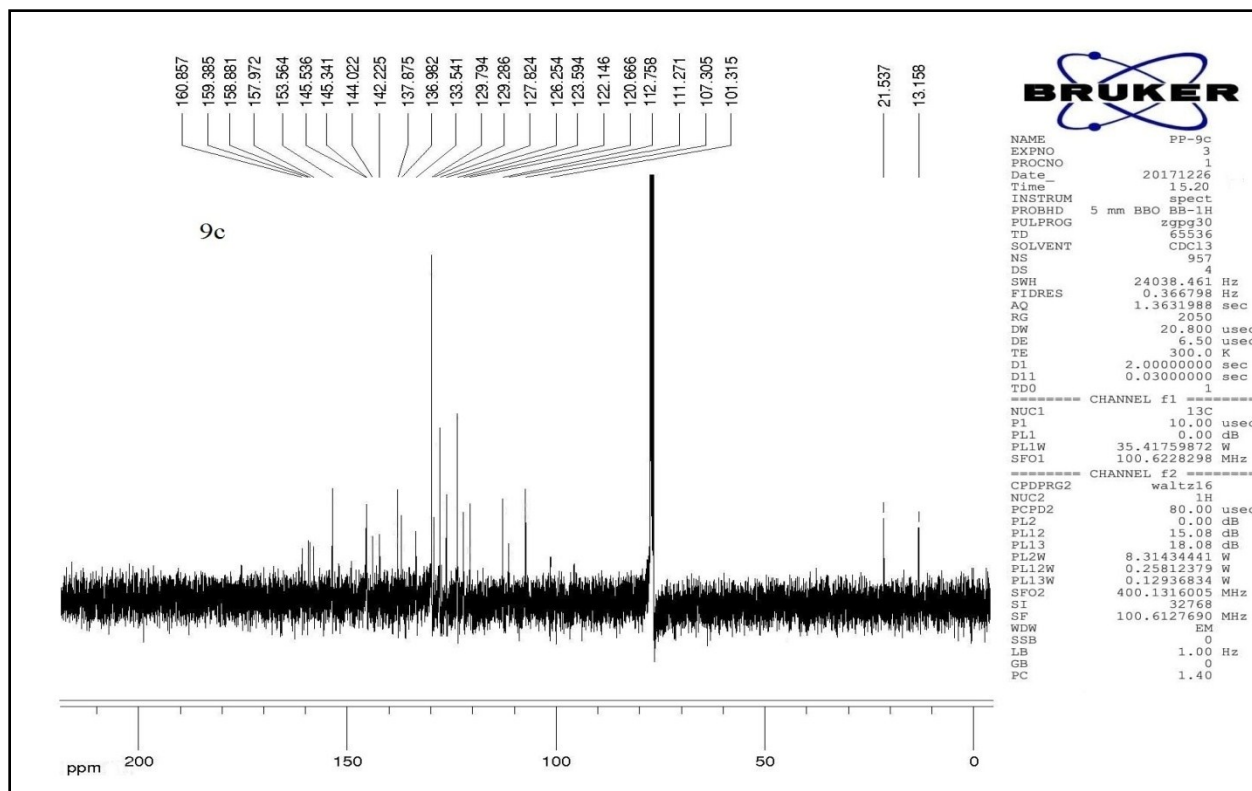

# <sup>13</sup>C NMR spectra of compound 9d

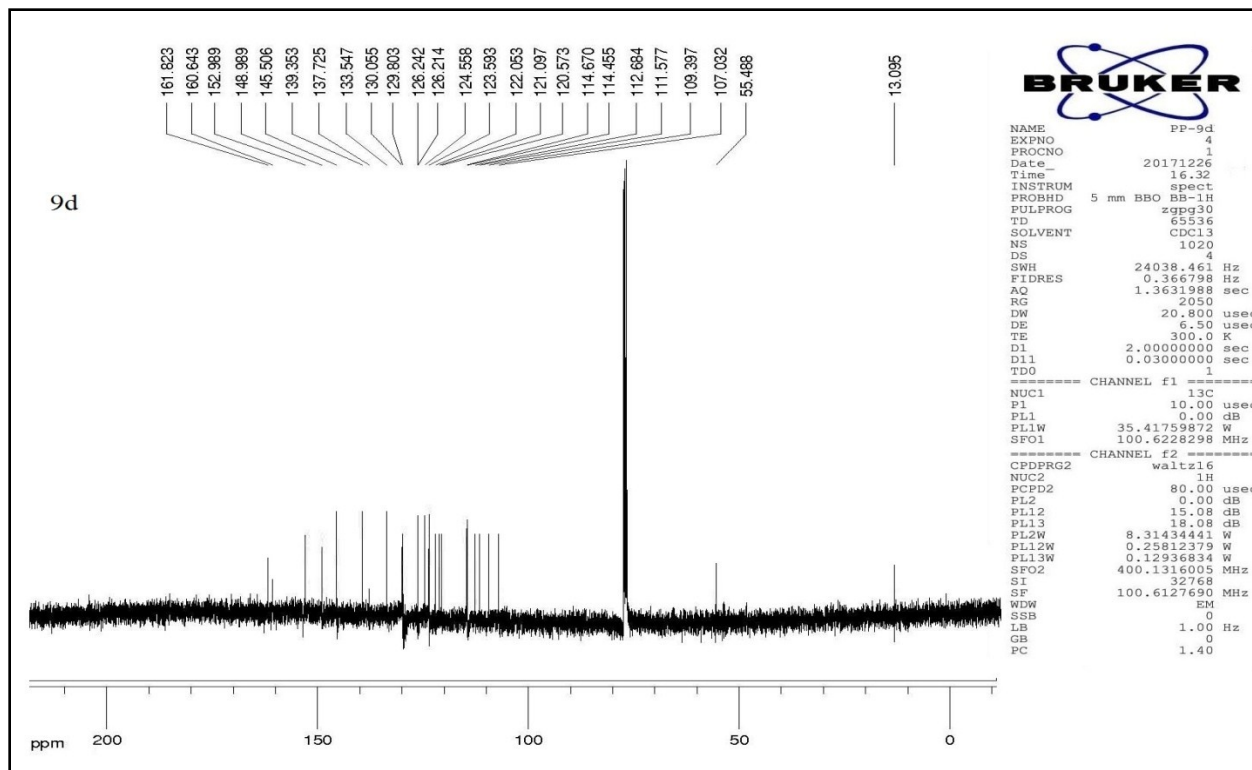

# <sup>13</sup>C NMR spectra of compound 9e

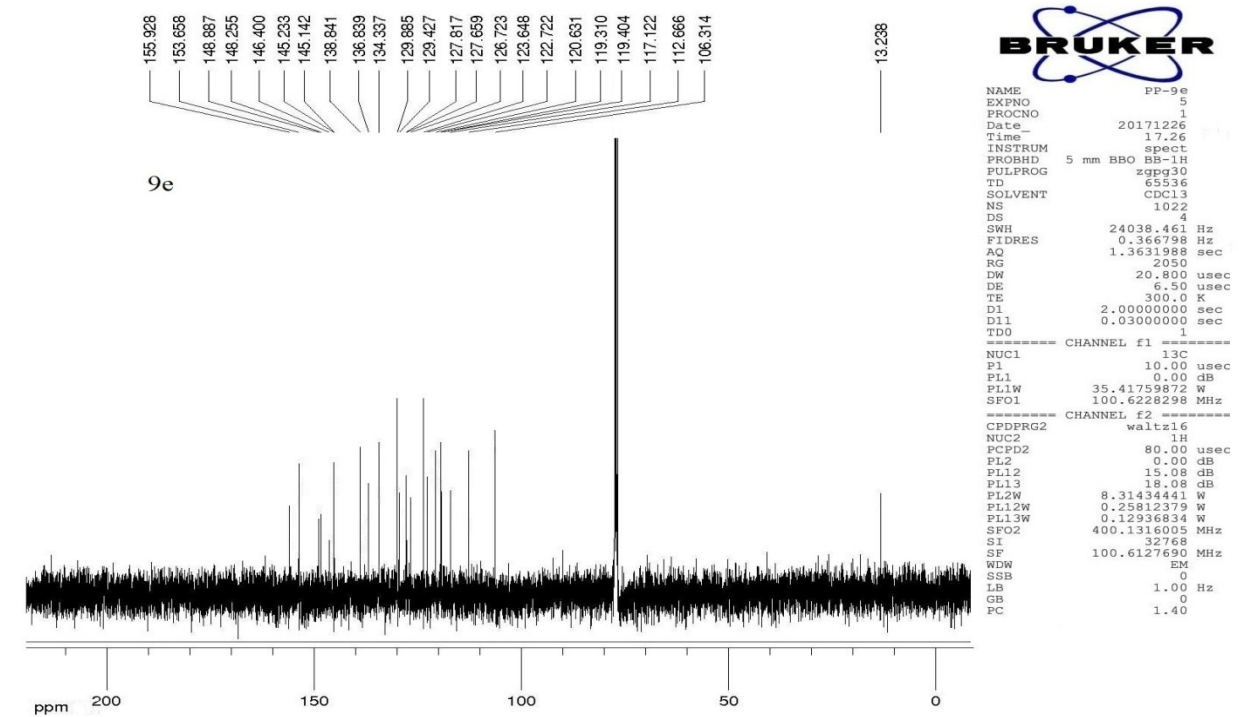

# <sup>13</sup>C NMR spectra of compound 9f

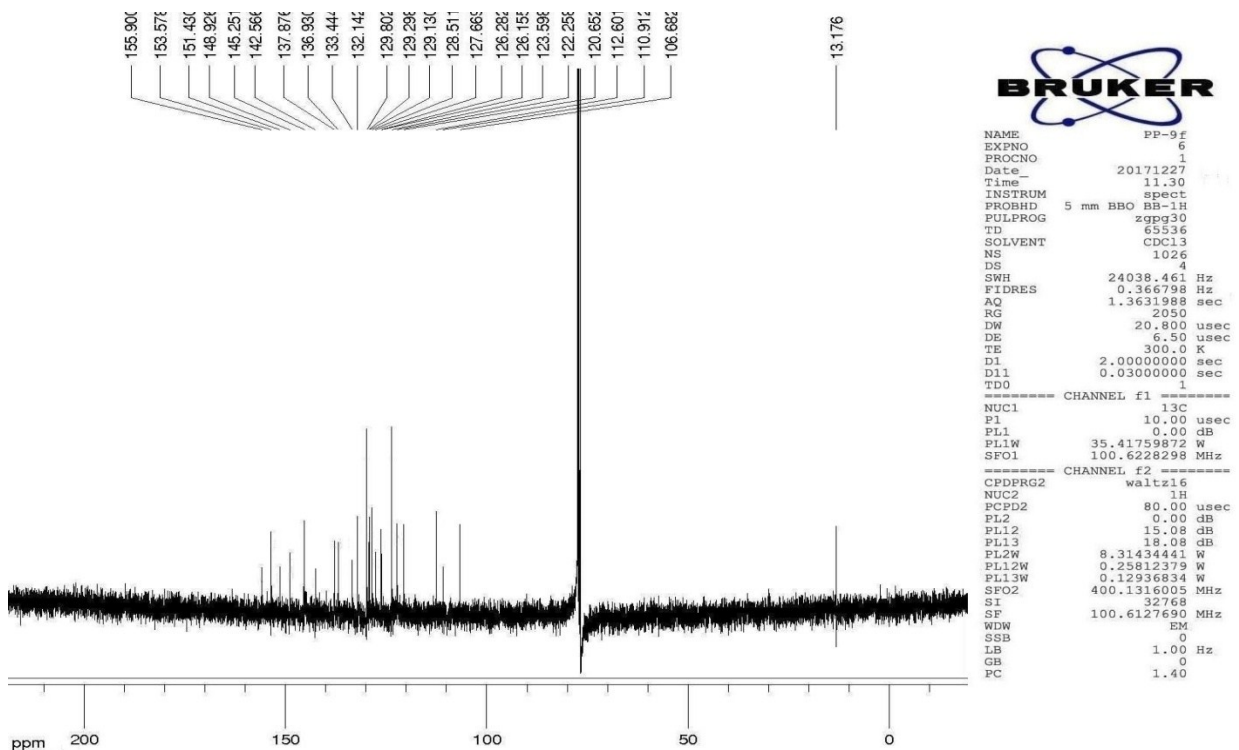

Mass spectra of compound **8a**

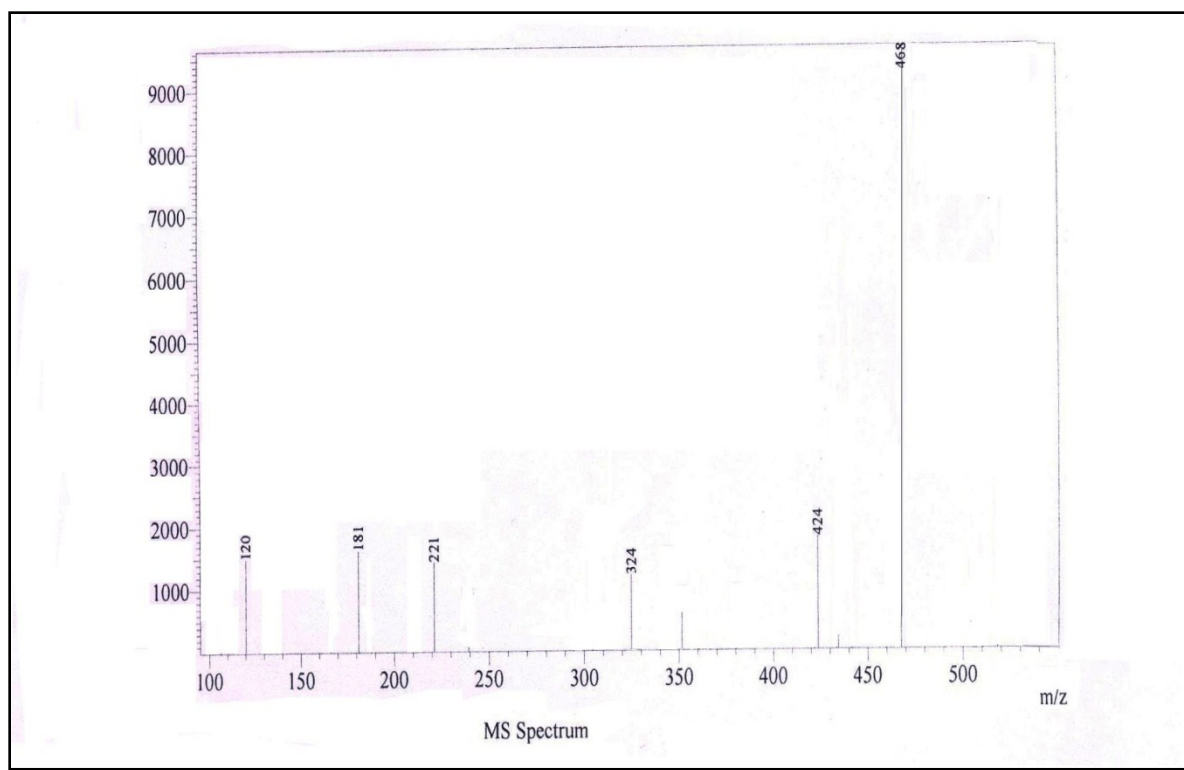

Mass spectra of compound **8d**

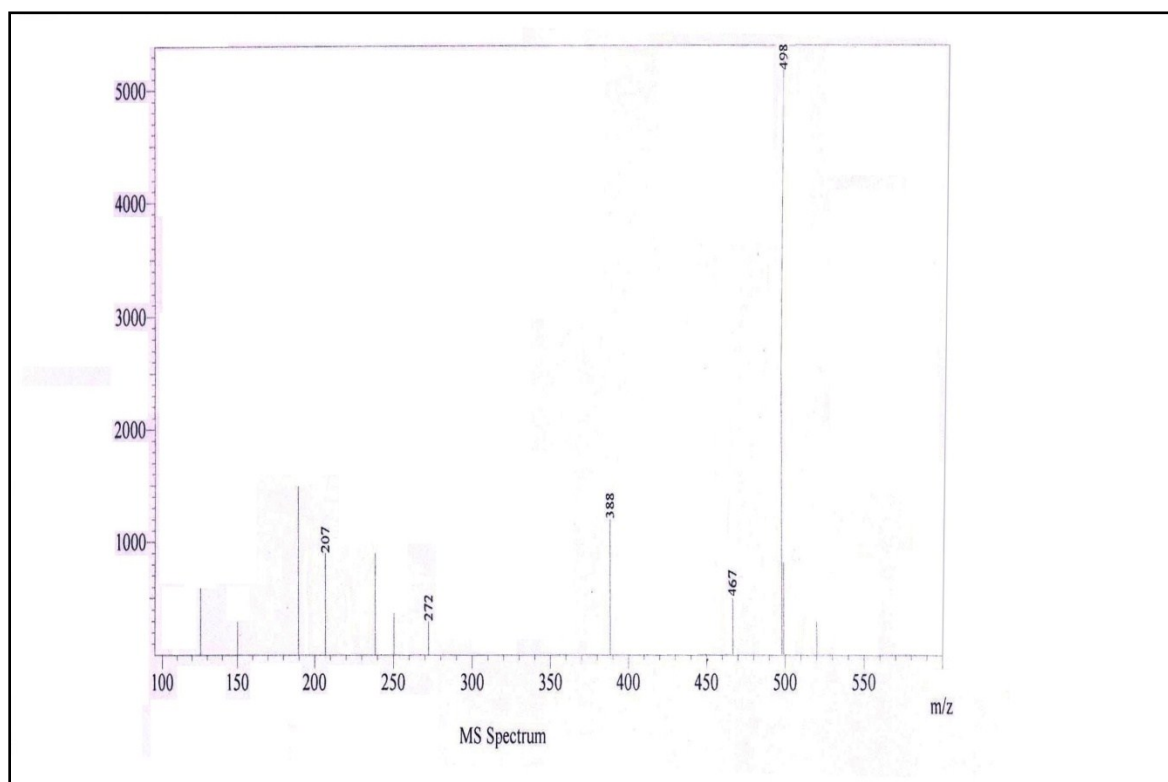



Mass spectra of compound **8g**

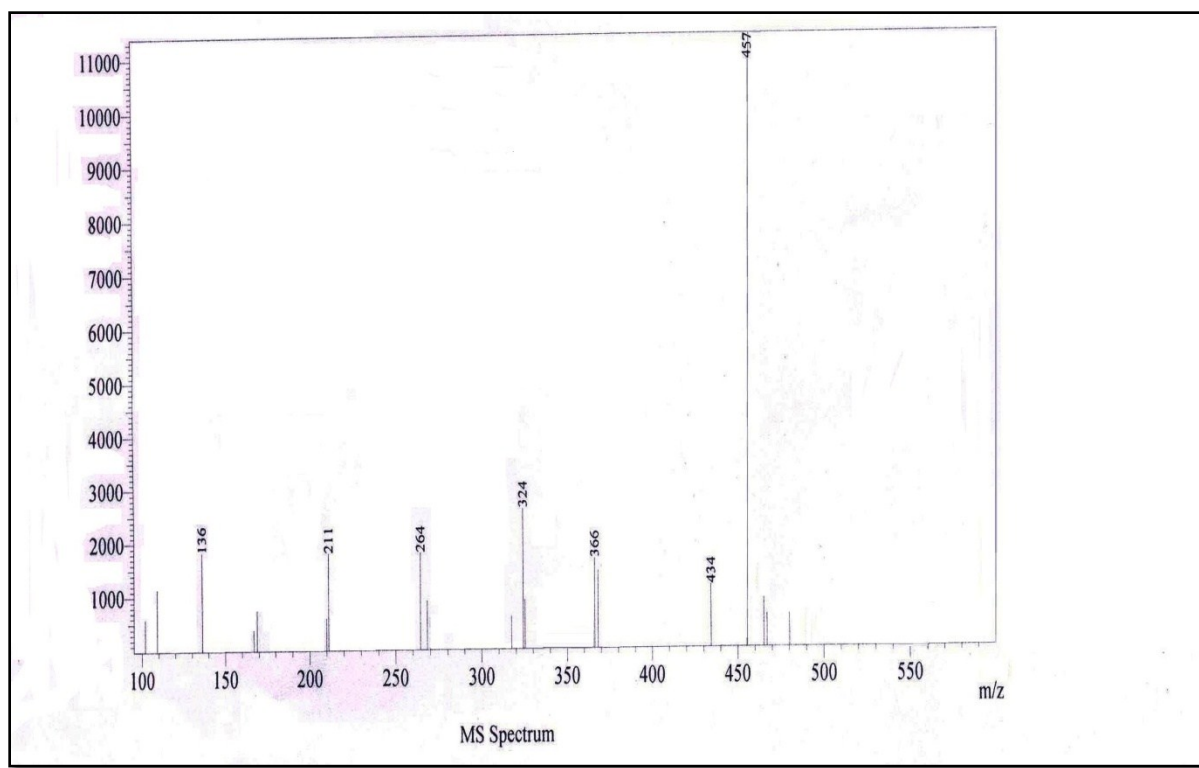

Mass spectra of compound **9a**

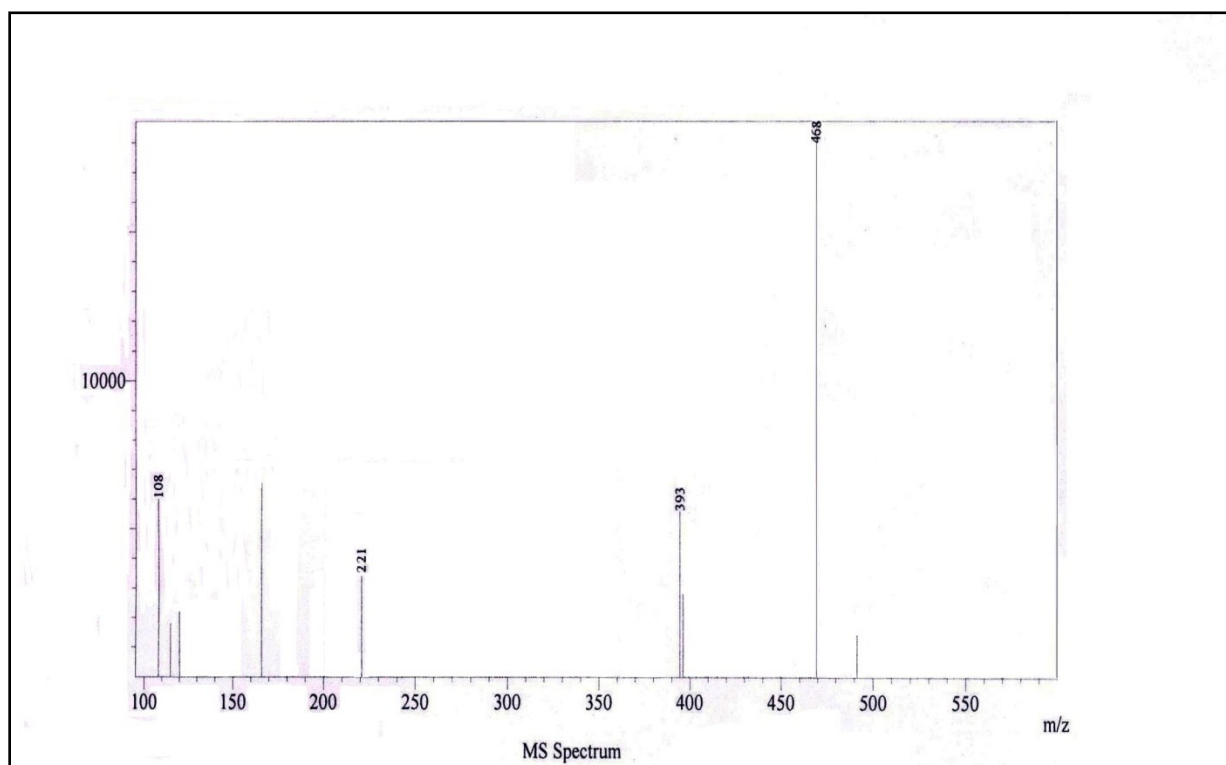

Mass spectra of compound **9c**

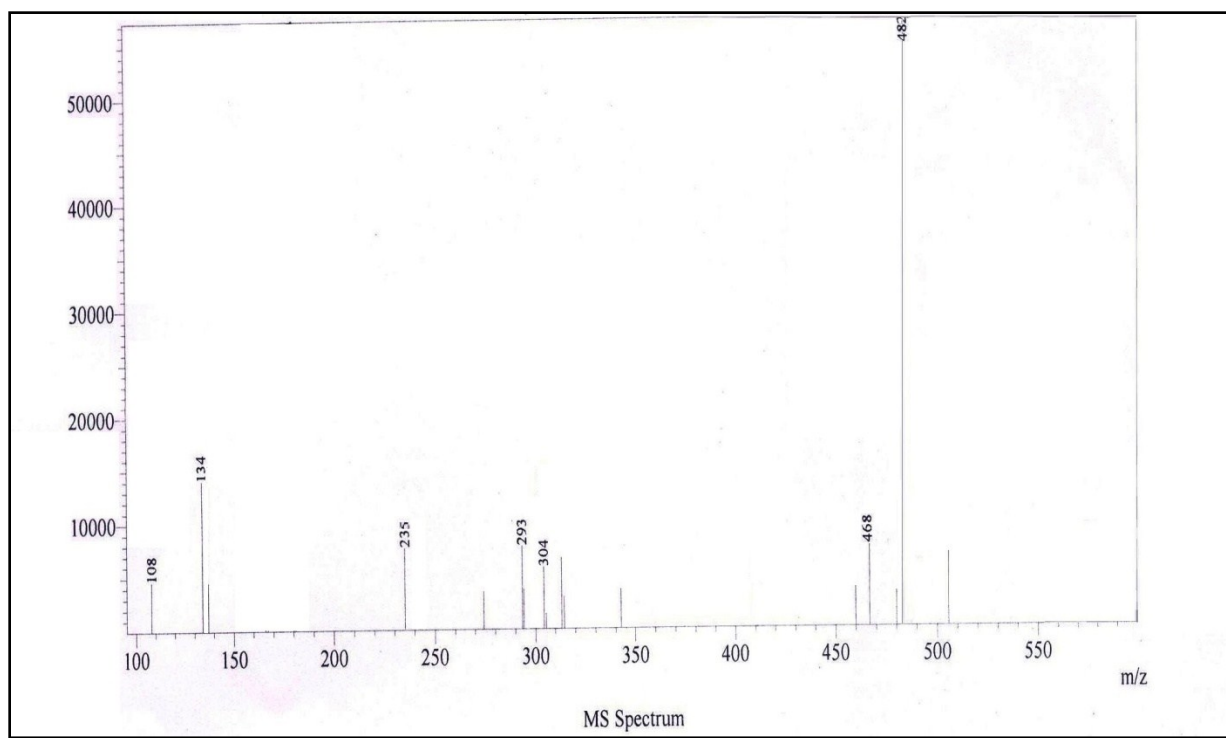

Mass spectra of compound **9f**

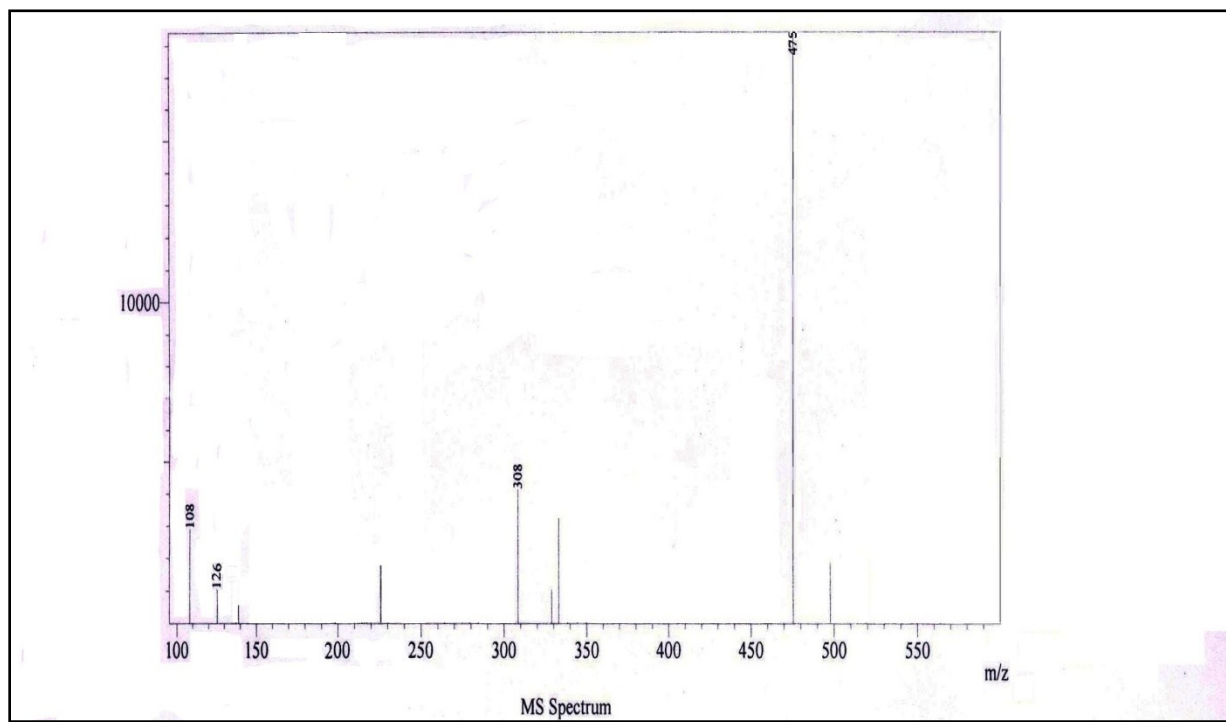

Supplement: c8nj00670a1.pdf [file c8nj00670a1.pdf]
